# Supplementary figures and images for: Liposome purification from micromolar protein background using diffusiophoretic trapping
Source: Royal Society of Chemistry journal article supplement (doi:10.1039/d5nr04453g), 2026-01-01

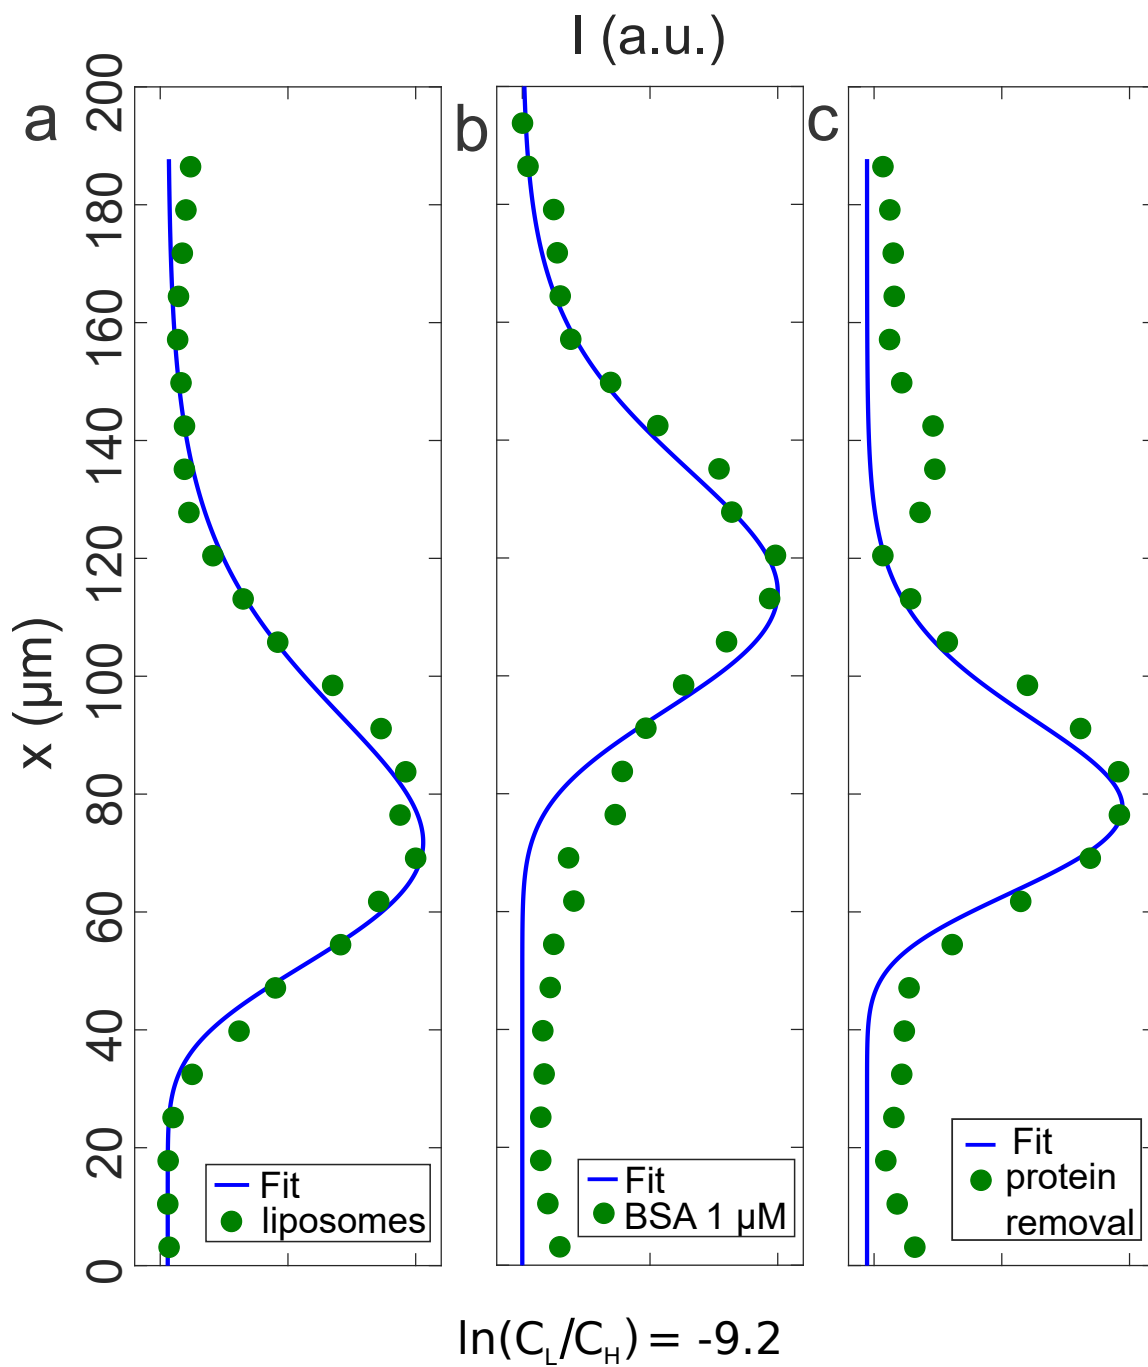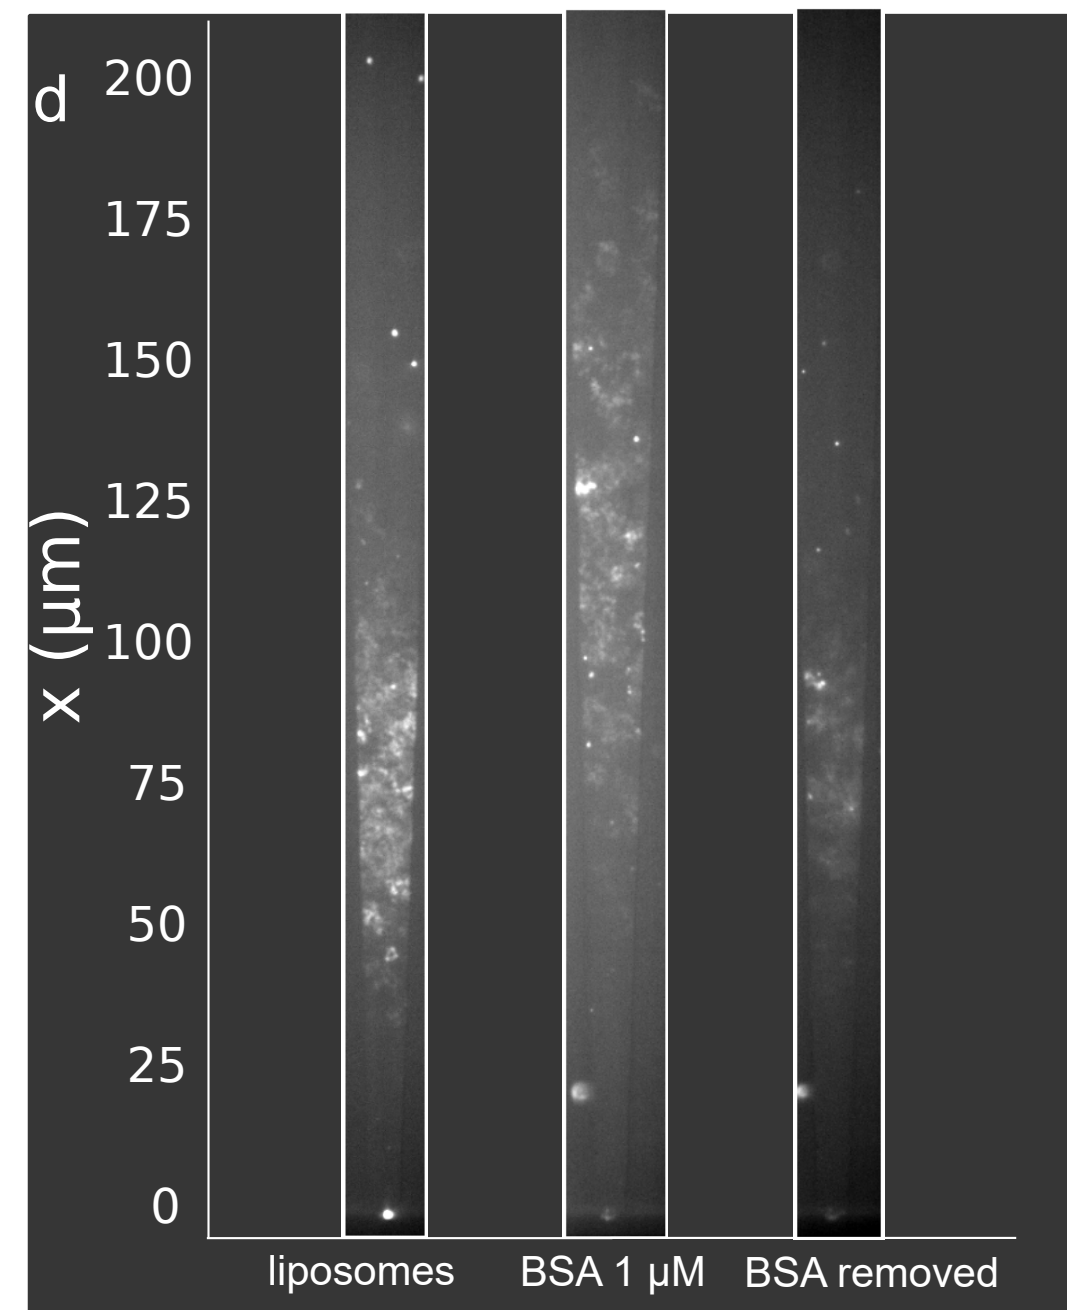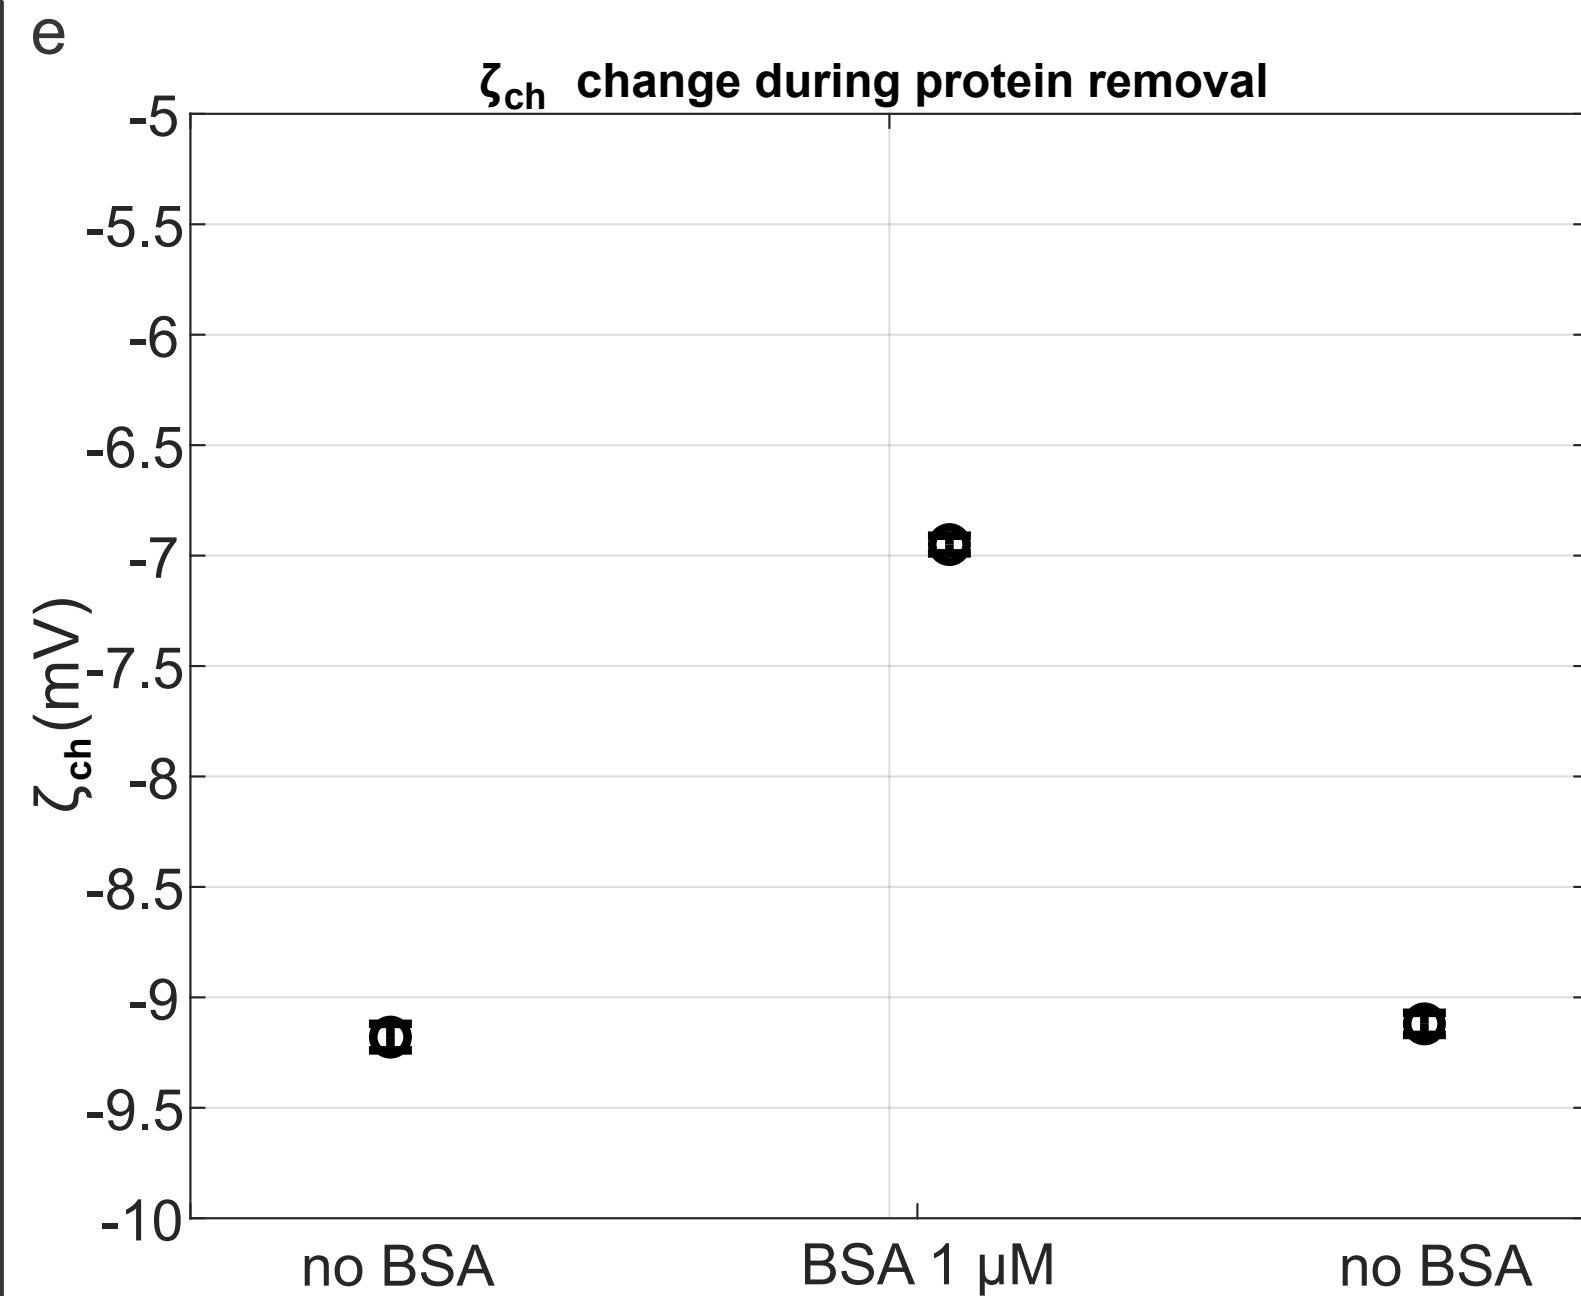

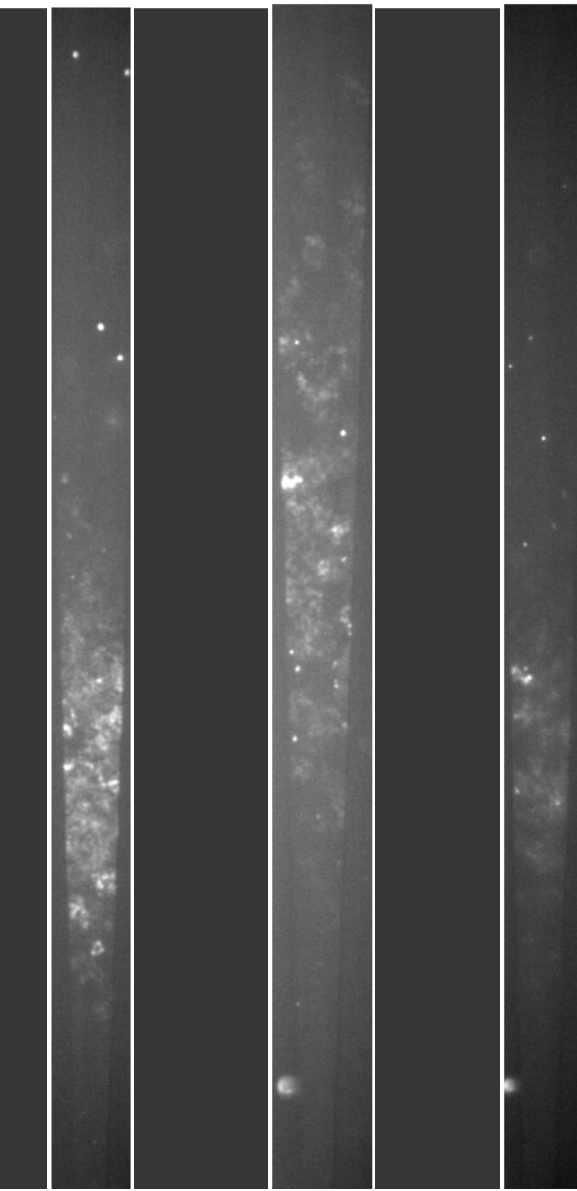

e

$\zeta_{\text{ch}} \text{ (mV)}$

-5  
-5.5  
-6  
-6.5  
-7  
-7.5  
-8  
-8.5  
-9  
-9.5

$\Theta$

ch change during protein

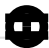

noval

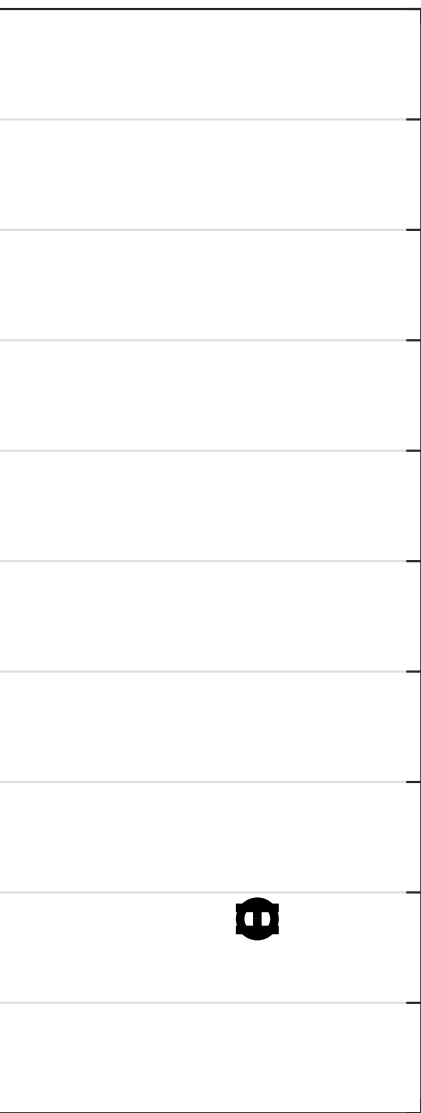

no BSA

Supplement: d5nr04453g6.pdf [file d5nr04453g6.pdf]
